# Supplementary material for: Self-lubricating properties of carbon filled oblique angle deposition porous TiN coating
Source: Research Square preprint supplement (doi:10.21203/rs.3.rs-6358874/v1), 2025-04-07
Supplement: Supplementary file 1 [file c657cd61e9a266b792d6387d.docx]

**Supplemental Materials**

**Self-lubricating properties of carbon filled oblique angle deposition porous TiN coating**

Kai Lea,b , Ke Lic, Yuzhen Liu*d*, Huijie Zhanga, Lina Gaoa,b, Yong Luoc*, Shusheng Xua,b*

*a State Key Laboratory of Solid Lubrication, Lanzhou Institute of Chemical Physics, Chinese Academy of Sciences, Lanzhou 730000, China*

*b Shandong Laboratory of Advanced Materials and Green Manufacturing at Yantai, Yantai 264000, China*

*c China School of Chemical Engineering and Technology, China University of Mining and Technology, Xuzhou 221116, China*

*d Department of Mechanical Engineering, Yonsei University, Seoul, 03722, Republic of Korea*

*Corresponding author.

E-mail address: sulyflying@cumt.edu.cn (Y. Luo), ssxu@licp.cas.cn (S. Xu).


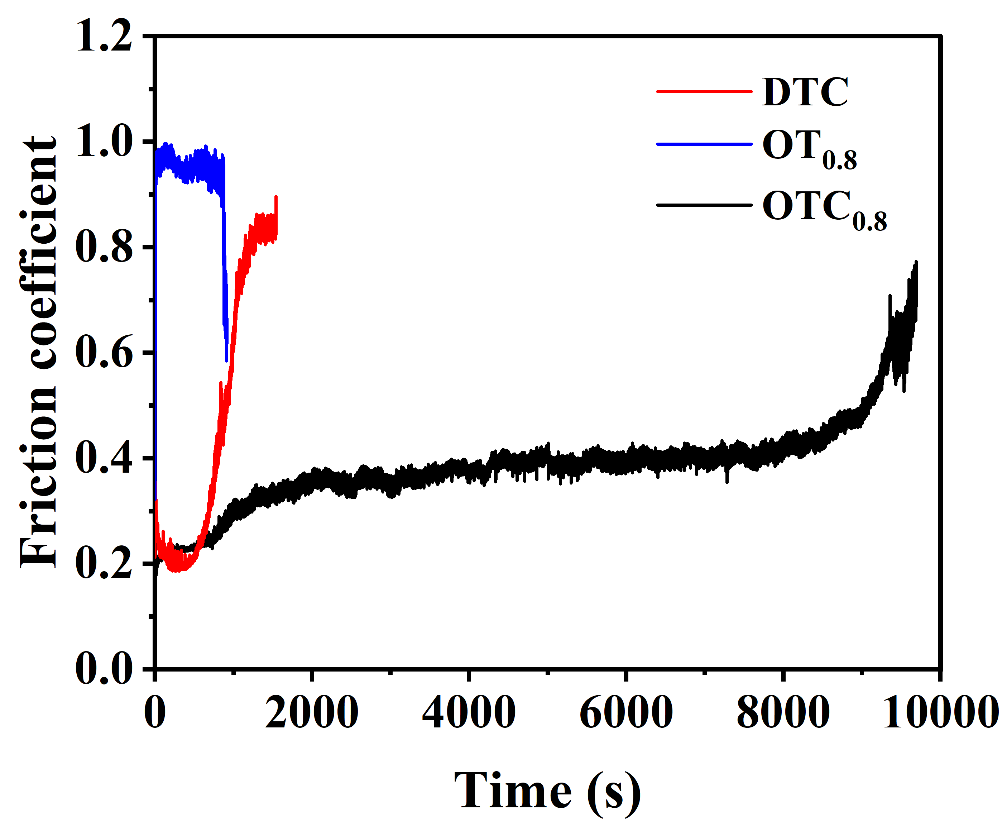


**Fig. S1** Friction coefficient curves of DTC, OT0.8 and OTC0.8 coatings.


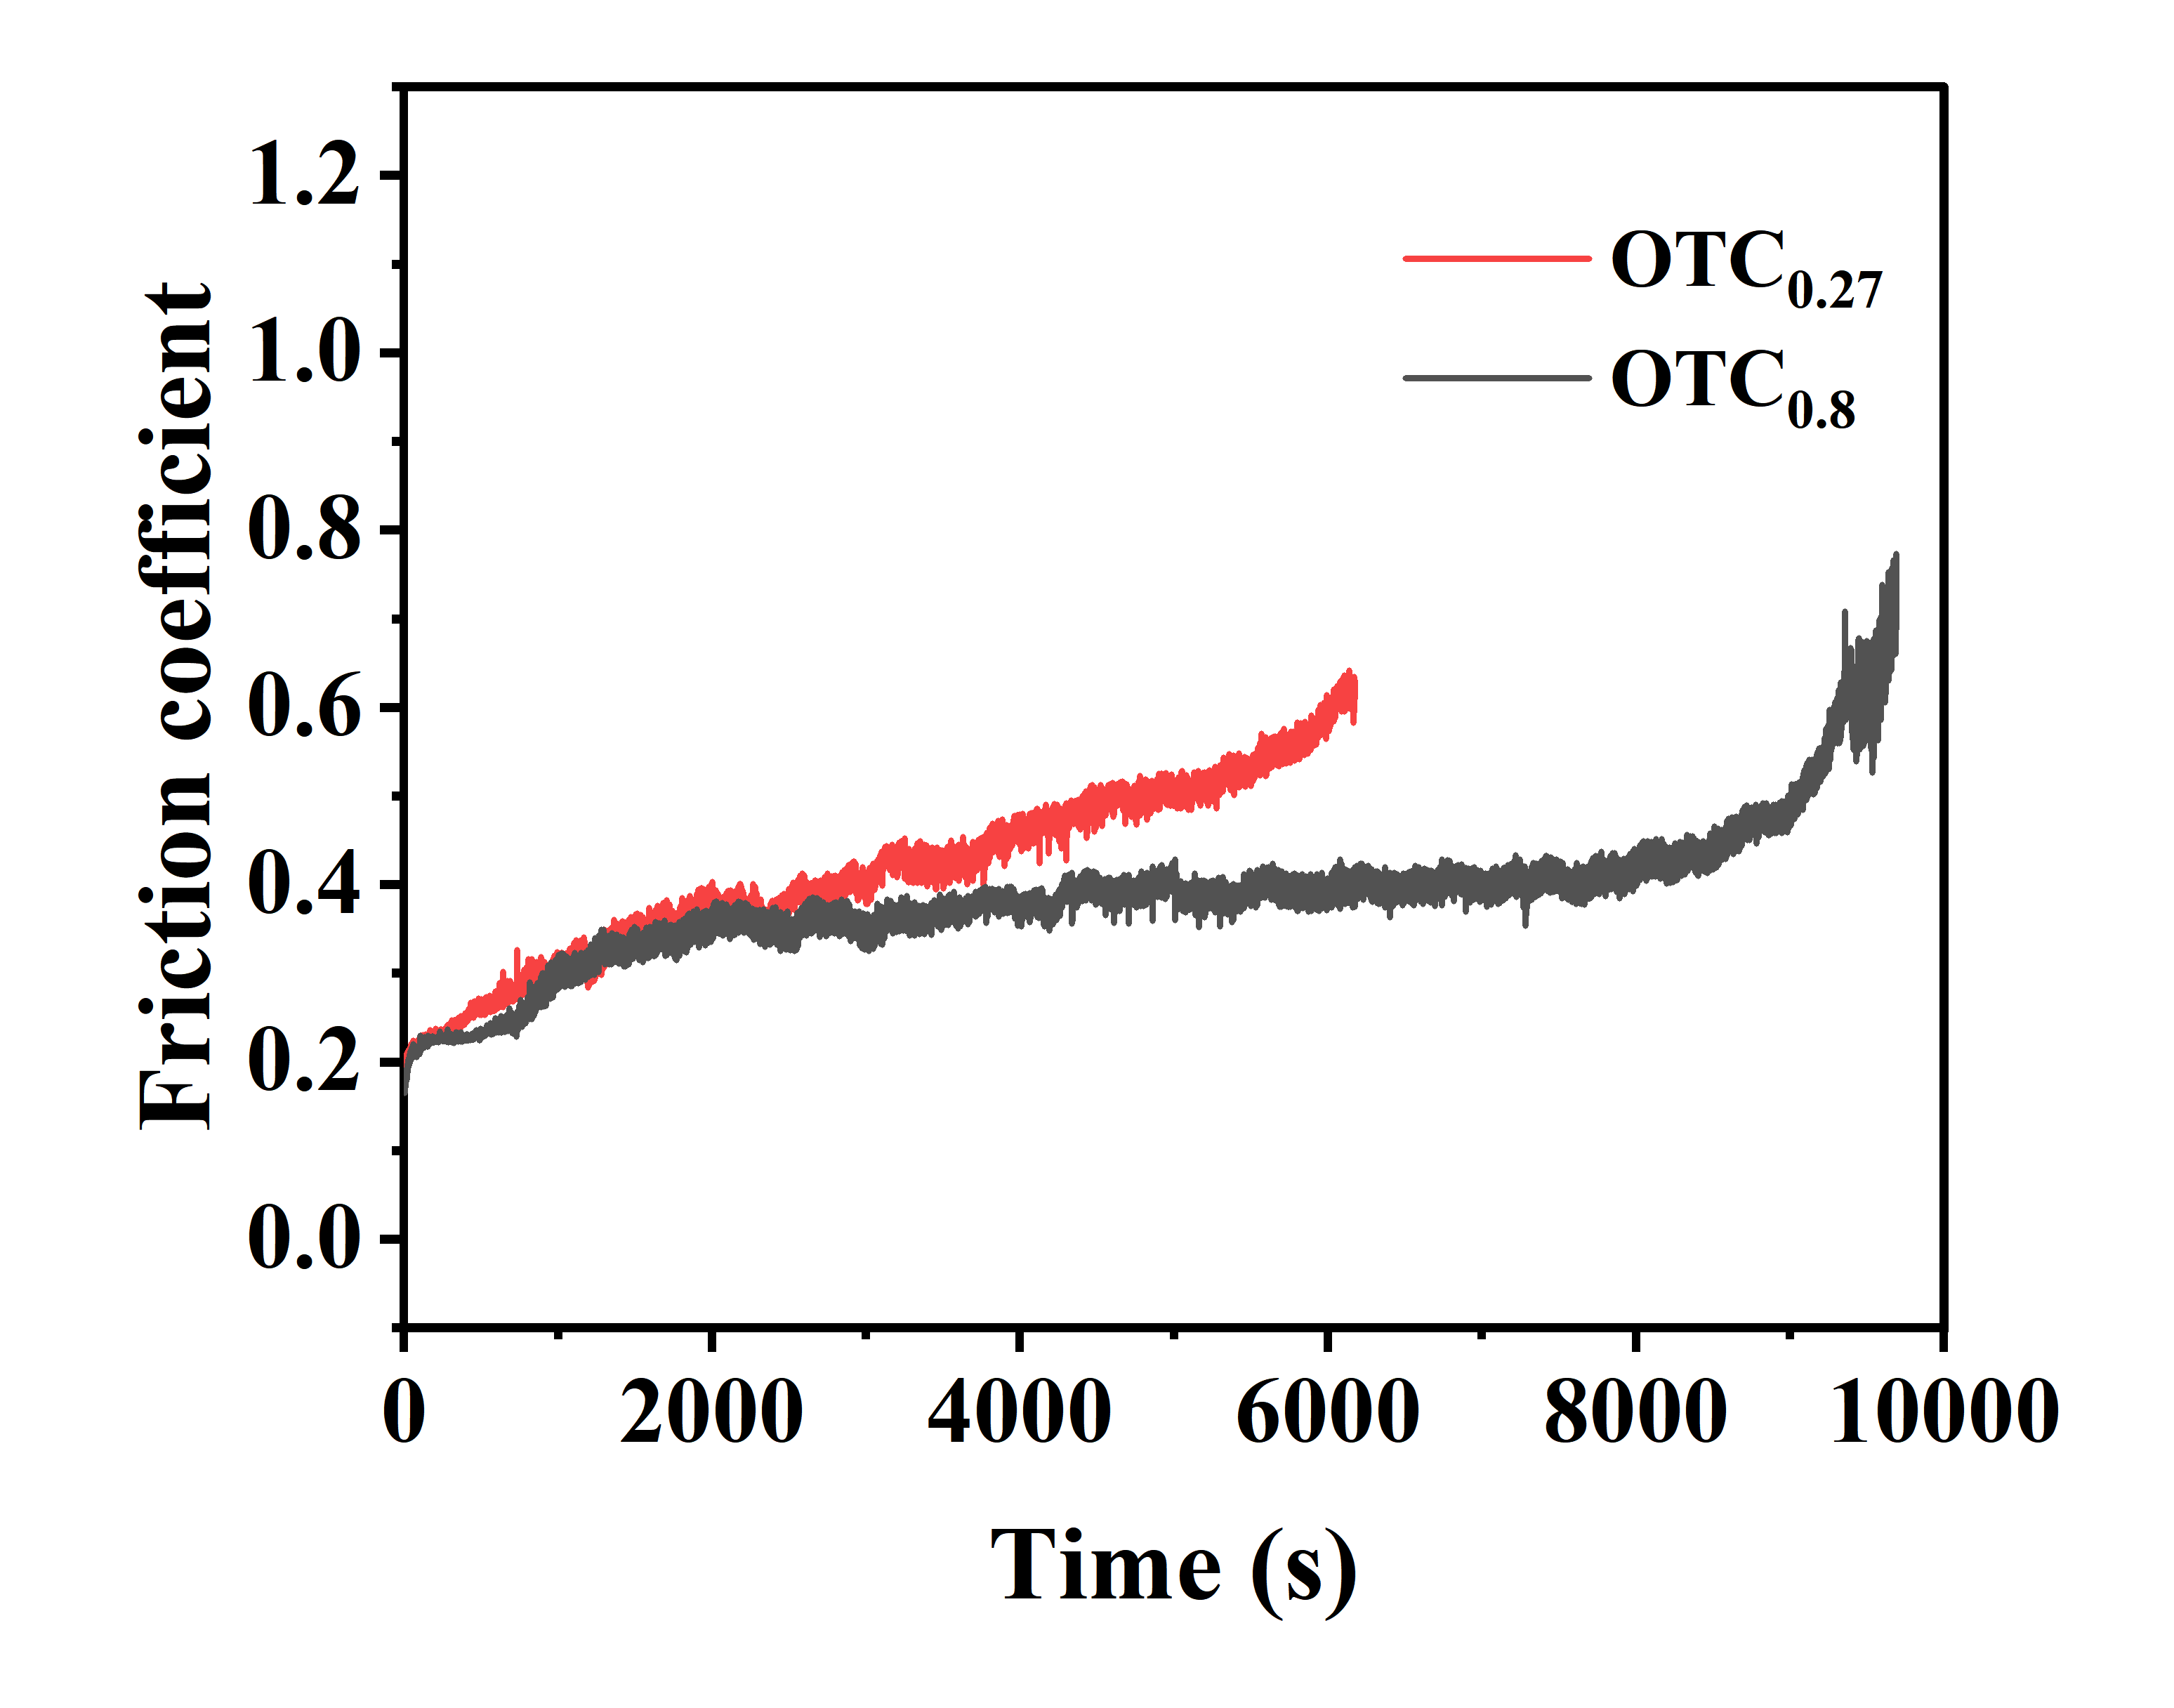


**Fig. S2** Friction coefficient curves of OTC0.27 and OTC0.8 coatings.
